# Supplementary material
Source: publisher site journal article supplement (https://www.dovepress.com/article/378167)
Supplement: Supplementary file 1 [file get_supplementary_file.php]

**Appendix 1**

**Contacting the authors**

An online questionnaire was designed and sent out to the corresponding authors of the selected articles (cf infra, the search strategy for the selection of articles is described elsewhere6). The questionnaire was designed in Qualtrics software, version December 2019 (Copyright 2019 Qualtrics, Provo, Utah, USA, cf infra).

The corresponding authors were contacted via the e-mail address provided in the articles. In case no corresponding author was indicated in the article, the first author was contacted.

The e-mail included a link to the questionnaire and an accompanying information letter. This information letter explained the context for performing this study and the aim of the study. Authors were also provided with information on theoretical design with reference to relevant textbooks (cf infra).

In case of no response after the first e-mail, two reminders were sent out (each one after two weeks). If the e-mail could not be delivered to the corresponding author (because of an invalid e-mail address), the last or first author was contacted depending on who the corresponding author was.

**Response**

In total, 15 authors completed the questionnaire. Out of these 15 authors, 7 were first author of the article as well as the corresponding author and 4 were last author of the article and also corresponding author. Of the remaining 4 authors, one author was the last author and was contacted by us because the e-mail address of the corresponding (and first) author was invalid, and three authors were last and corresponding author but forwarded the questionnaire to the first author of the article who then filled in the questionnaire. For one author we decided to omit the questionnaire because the author requested not to quote the answers.

**Selected articles**

For the following articles (n = 30) the corresponding author was contacted or the first author in case no corresponding author was indicated in the article.

Ahmadizar F, Vijverberg SJH, Arets HGM, et al. Early life antibiotic use and the risk of asthma and asthma exacerbations in children. *Pediatr Allergy Immunol.* 2017;28(5):430-437.

Chen IL, Huang HC, Chang YH, et al. Effect of antibiotic use for acute bronchiolitis on new-onset asthma in children. *Sci Rep.* 2018;8(1):6090.

Chu S, Yu H, Chen Y, Chen Q, Wang B, Zhang J. Periconceptional and Gestational Exposure to Antibiotics and Childhood Asthma. *PLoS One.* 2015;10(10):e0140443.

Del-Rio-Navarro B, Berber A, Blandon-Vijil V, et al. Identification of asthma risk factors in Mexico City in an International Study of Asthma and Allergy in Childhood survey. *Allergy Asthma Proc.* 2006;27(4):325-333.

Floistrup H, Swartz J, Bergstrom A, et al. Allergic disease and sensitization in Steiner school children. *J Allergy Clin Immunol.* 2006;117(1):59-66.

Foliaki S, Pearce N, Bjorksten B, et al. Antibiotic use in infancy and symptoms of asthma, rhinoconjunctivitis, and eczema in children 6 and 7 years old: International Study of Asthma and Allergies in Childhood Phase III. *J Allergy Clin Immunol.* 2009;124(5):982-989.

Gupta RS, Singh AM, Walkner M, et al. Hygiene factors associated with childhood food allergy and asthma. *Allergy Asthma Proc.* 2016;37(6):e140-e146.

Han YY, Forno E, Badellino HA, Celedon JC. Antibiotic Use in Early Life, Rural Residence, and Allergic Diseases in Argentinean Children. *J Allergy Clin Immunol Pract.* 2017;5(4):1112-1118 e1112.

Huo X, Chu S, Hua L, et al. The effect of breastfeeding on the risk of asthma in high-risk children: a case-control study in Shanghai, China. *BMC Pregnancy Childbirth.* 2018;18(1):341.

Kashanian M, Mohtashami SS, Bemanian MH, Moosavi SAJ, Moradi Lakeh M. Evaluation of the associations between childhood asthma and prenatal and perinatal factors. *Int J Gynaecol Obstet.* 2017;137(3):290-294.

Kim DH, Han K, Kim SW. Effects of Antibiotics on the Development of Asthma and Other Allergic Diseases in Children and Adolescents. *Allergy Asthma Immunol Res.* 2018;10(5):457-465.

Korpela K, Salonen A, Virta LJ, et al. Intestinal microbiome is related to lifetime antibiotic use in Finnish pre-school children. *Nat Commun.* 2016;7:10410.

Kozyrskyj AL, Ernst P, Becker AB. Increased risk of childhood asthma from antibiotic use in early life. *Chest.* 2007;131(6):1753-1759.

Kusel MM, de Klerk N, Holt PG, Sly PD. Antibiotic use in the first year of life and risk of atopic disease in early childhood. *Clin Exp Allergy.* 2008;38(12):1921-1928.

Lapin B, Piorkowski J, Ownby D, et al. Relationship between prenatal antibiotic use and asthma in at-risk children. *Ann Allergy Asthma Immunol.* 2015;114(3):203-207.

Lee E, Kwon JW, Kim HB, et al. Association Between Antibiotic Exposure, Bronchiolitis, and TLR4 (rs1927911) Polymorphisms in Childhood Asthma. *Allergy Asthma Immunol Res.* 2015;7(2):167-174.

Loewen K, Monchka B, Mahmud SM, t Jong G, Azad MB. Prenatal antibiotic exposure and childhood asthma: a population-based study. *Eur Respir J.* 2018;52(1).

Marra F, Marra CA, Richardson K, et al. Antibiotic use in children is associated with increased risk of asthma. *Pediatrics.* 2009;123(3):1003-1010.

Martel MJ, Rey E, Malo JL, et al. Determinants of the incidence of childhood asthma: a two-stage case-control study. *Am J Epidemiol.* 2009;169(2):195-205.

Mitchell EA, Robinson E, Black PN, et al. Risk factors for asthma at 3.5 and 7 years of age. *Clin Exp Allergy.* 2007;37(12):1747-1755.

Mitchell EA, Stewart AW, Clayton T, et al. Cross-sectional survey of risk factors for asthma in 6-7-year-old children in New Zealand: International Study of Asthma and Allergy in Childhood Phase Three. *J Paediatr Child Health.* 2009;45(6):375-383.

Mitre E, Susi A, Kropp LE, Schwartz DJ, Gorman GH, Nylund CM. Association Between Use of Acid-Suppressive Medications and Antibiotics During Infancy and Allergic Diseases in Early Childhood. *JAMA Pediatr.* 2018;172(6):e180315.

Mulder B, Pouwels KB, Schuiling-Veninga CC, et al. Antibiotic use during pregnancy and asthma in preschool children: the influence of confounding. *Clin Exp Allergy.* 2016;46(9):1214-1226.

Pitter G, Ludvigsson JF, Romor P, et al. Antibiotic exposure in the first year of life and later treated asthma, a population based birth cohort study of 143,000 children. *Eur J Epidemiol.* 2016;31(1):85-94.

Soto-Martinez ME, Yock-Corrales A, Camacho-Badilla K, et al. The current prevalence of asthma, allergic rhinitis, and eczema related symptoms in school-aged children in Costa Rica. *J Asthma.* 2019;56(4):360-368.

Stromberg Celind F, Wennergren G, Vasileiadou S, Alm B, Goksor E. Antibiotics in the first week of life were associated with atopic asthma at 12 years of age. *Acta Paediatr.* 2018;107(10):1798-1804.

Wickens K, Ingham T, Epton M, et al. The association of early life exposure to antibiotics and the development of asthma, eczema and atopy in a birth cohort: confounding or causality? *Clin Exp Allergy.* 2008;38(8):1318-1324.

Wu P, Feldman AS, Rosas-Salazar C, et al. Relative Importance and Additive Effects of Maternal and Infant Risk Factors on Childhood Asthma. *PLoS One.* 2016;11(3):e0151705.

Yamamoto-Hanada K, Yang L, Narita M, Saito H, Ohya Y. Influence of antibiotic use in early childhood on asthma and allergic diseases at age 5. *Ann Allergy Asthma Immunol.* 2017;119(1):54-58.

Yoshida S, Ide K, Takeuchi M, Kawakami K. Prenatal and early-life antibiotic use and risk of childhood asthma: A retrospective cohort study. *Pediatr Allergy Immunol.* 2018;29(5):490-495.

**Information letter**

**Theoretical design in epidemiological (etiological) research**

**Context**

Our research department, Epidemiology and Social Medicine (ESOC), has been involved in asthma research since 1990. We have been one of the participating centers in the European Community Respiratory Health Study (ECRHS) and in the International Study of Asthma and Allergies in Childhood (ISAAC). The department also started its own birth cohort, the Prospective study on the Influence of Perinatal factors on the Occurrence of asthma and allergies (PIPO). Specific interest goes to the influence of early life exposures on the occurrence of allergic diseases in childhood, including the association between exposure to antibiotics in early childhood and the occurrence of asthma10. Up to date, results of research on this association have been conflicting. We want to investigate to what extent these conflicting results can be explained by differences in the approach of study design. To our knowledge, only a few reviews focus on methodology, but mostly restricted to the method of data collection (retrospective vs prospective) and the influence of confounding by indication and reverse causation7-9

**Aim**

One of the aims of this PhD project is to examine the influence of theoretical design on results in epidemiological etiologic research. The first part of this project is a methodological review. We critically reviewed papers, that investigated the causal relationship between exposure to antibiotics and the occurrence of asthma, on the reported study design with emphasis on theoretical design. Your paper was one of the papers that was reviewed. Therefore, we would like to ask you 17 questions concerning your study design.

**Theoretical design**

Our interest goes in particular to the formulation of a theoretical design. Theoretical design is an important part of study design in epidemiological research as described by Grobbee and Hoes in their textbook on clinical epidemiology1. According to the textbook, this starts with the formulation of a research question, which should include the exposure(s), the outcome and the domain. This research question is then translated into an occurrence relation. The occurrence relation in etiologic research is the outcome as a function of the exposure, taking other relevant determinants into account (extraneous: confounders; non-extraneous: effect modifiers)1. A similar approach was already described in the 80’s of last century by Olli Miettinen, who also includes the time relation and directionality as important elements of the occurrence relation2. Also David Kleinbaum emphasized that this directionality is crucial for the interpretation of epidemiological findings, since it allows the researcher to distinguish between what is an antecedent and what is a consequence.10

**Review of the papers**

We extracted the following information relating to study design from the selected papers:

• Research question or aim

**•** The domain of the research

• Definition of the outcome and exposure and the measure of outcome occurrence

• Reported study design: the theoretical design, the design of data collection & the design of data analysis (with special interest for the temporal aspects, the measure of association and the addressment of confounders and effect modifiers.)

In case of non-explicit formulation of a theoretical design, we defined ourselves a theoretical design based on the information from the article.

The extracted information and the formulated theoretical designs was registered at the Institutional Repository of the University of Antwerp (IRUA) on the 4th of December 2019. After this date no changes were made to this document.

**Questions to the authors**

The next step in our project is to ask the authors of the papers about different aspects of theoretical design related to their published research. We do not have the intention to question authors about their knowledge on this subject. We are interested in how the authors initially conceived the theoretical design of their study before going into the reviewing process, because we are aware that the reviewing process could lead to changes in the manuscript.

We have formulated 17 questions and we hope that you are willing to answer them. This will only take 5 to 10 minutes of your time. We will then compare the formulated answers with the registered table. The results of this exercise will be communicated with the authors, with the view of receiving comments and will be presented for publication to the European Journal of Epidemiology. Feel free to contact us after filling in the questionnaire if you would like to consult the theoretical design we have formulated for your study. We are happy to share this information with you.

Thank you for your participation!

***Contact:***

*PhD-student: Hayat Bentouhami - Social Epidemiology and Health Policy, department of Epidemiology and Social Medicine, Faculty of Medicine and Health Sciences, University of Antwerp – hayat.bentouhami@uantwerp.be*

*Promotor: prof. dr. Joost Weyler - Social Epidemiology and Health Policy, department of Epidemiology and Social Medicine, Faculty of Medicine and Health Sciences, University of Antwerp – joost.weyler@uantwerp.be*

**Questionnaire (online survey)**

Dear researcher,

In the following sections of this survey we will ask you questions that relate to the study design of your article that was sent to you as attachment in the mail you have received. Answering these questions will only take 5 to 10 minutes of your time.

We will first ask for your first and last name and the title of your article. We need this information to be able to connect the provided information with the correct article and with the theoretical design(s) we have formulated ourselves.

During the survey you are able to close your browser. Your answers will be saved automatically and upon your return you can continue the survey where you left off. If you have additional questions please do not hesitate to contact us: hayat.bentouhami@uantwerpen.be. At the end of the survey we also give you the opportunity to provide us with comments.

We thank you for your participation!

Best regards

Hayat Bentouhami, MSc

PhD-student

Epidemiology and Social Medicine, University of Antwerp

hayat.bentouhami@uantwerp.be

Prof. Em. Joost Weyler

Epidemiologist (MD, PhD)

Epidemiology and Social Medicine, University of Antwerp

Please indicate that you understand that we use your first name and last name to connect the provided information and the correct article reviewed and the theoretical design we have formulated and that you are willing to participate in this survey.

- I understand and agree
- I do not wish to fill in the survey

Please enter your first and last name.

Please enter the title of your article that was reviewed by us.

1. According to you, what is the research question behind your study?
2. What is the domain of your study?
3. Was the primary aim of your study to investigate a causal relationship between antibiotics exposure and the occurrence of asthma, or was this a secondary aim?
   - Primary aim
   - Secondary aim
4. What is the translation, according to you, of your research question into an occurrence relation (theoretical design)?
5. How did you sample the study population?
   - Cumulative sampling
   - Case-cohort sampling
   - Incidence density sampling
   - Other (specify):
6. Can you specify what the directionality is between outcome (asthma) and exposure (antibiotics)?
   - The current prevalence of asthma as a function of past exposure to antibiotics.
   - The current incidence of asthma as a function of past exposure to antibiotics.
   - The current prevalence of asthma as a function of current exposure to antibiotics.
   - The current incidence of asthma as a function of current exposure to antibiotics.
   - The future prevalence of asthma as a function of current exposure to antibiotics.
   - The future incidence of asthma as a function of current exposure to antibiotics.
   - Other (specify):
7. Have you used any aspect of some causal theory in order to decide on confounders and effect modifiers (e.g.: DAGs)?
   - No
   - Yes (specify which theory):
8. What are the confounders you have taken into account to adjust for the crude association between exposure to antibiotics and the occurrence of asthma?
9. Have you considered effect modification in your analysis for the association between exposure to antibiotics and the occurrence of asthma?
   - No
   - Yes (specify which effect modifiers):
10. How familiar are you with the concept of theoretical design?
    - Not at all familiar
    - Slightly familiar
    - Somewhat familiar
    - Moderately familiar
    - Extremely familiar
11. How familiar are you with the concept of causal theory (e.g. DAGs,…)?
    - Not at all familiar
    - Slightly familiar
    - Somewhat familiar
    - Moderately familiar
    - Extremely familiar
12. How familiar are you with the concept of confounding?
    - Not at all familiar
    - Slightly familiar
    - Somewhat familiar
    - Moderately familiar
    - Extremely familiar
13. How familiar are you with the concept of effect modification?
    - Not at all familiar
    - Slightly familiar
    - Somewhat familiar
    - Moderately familiar
    - Extremely familiar
14. Did you make changes to your manuscript that you did not agree with, but the reviewers expected you to do so?
    - No (go to question 16)
    - Yes (go to question 15)
15. If yes, where these changes related to:
    - The formulation of the research question or aim
    - The case and control definition
    - The statistical analysis
    - Adjustment for confounding
    - The handling of effect modification
    - Other (specify):
16. Was there any comment of one of the reviewers that you did not agree with, and if so what comment was that (please also send us the comments of the reviewers from the first reviewing process to [hayat.bentouhami@uantwerp.be](mailto:hayat.bentouhami@uantwerp.be))?
    - I agreed with all the comments.
    - I did not agree with the following comment(s):
17. Was there an epidemiologist involved in your study?
    - No
    - Yes

If you have any additional comments, please state below:

**End of questionnaire**

**Appendix 2**

**Answers of the authors**

Below, the answers of the authors are presented one by one per group and per topic. The answers are quoted verbatim and are anonymized.

**Research question**

The authors were asked to formulate a research question. In the information letter accompanying the questionnaire, we explained that a research question should encompass the outcome, the exposure, as well as the domain of the study.

*Group 1:*

1. To assess the association between use of antibiotic during the first 3 years of life and the risk of developing childhood asthma and the occurrence of asthma exacerbations.
2. To determine the association between oral antibiotic use in the first year of life and asthma at age 7 years in a large cohort of children
3. What is the association between antibiotic use during pregnancy and the occurrence of asthma in preschool children.

*Group 2:*

1. evaluate whether exposure to antibiotics during the first 12 months of life increases the risk of subsequent treated asthma (identified through antiasthmatic drug prescriptions) in a large population-based birth cohort retrospectively followed for up to 17 years, with a carefully planned design capable of decreasing the chance of bias.
2. What is the current prevalence of asthma, allergic rhinitis, and eczema related symptoms in school-aged children in Costa Rica?
3. Our study was to examine whether antibiotic use affected the risk of atopic diseases (current wheeze or allergic rhinoconjunctivitis) differently between children living in urban areas in early life and those living in rural areas in early life
4. to identify and quantify risk factors for asthma
5. My basic research question is how enviornment is neccessary for healthy development in children.
6. the relation between postnatal antibiotic exposures within the first 2 years of life and allergic diseases in children at 5 years of age in Japan

*Group 3:*

1. To identify the determinants of the incidence of childhood asthma
2. To determine the relative importance and cumulative effect of pre- and post-natal environmental risk factors on the development of childhood asthma”
3. Does the use of antibiotics prenatally have an association with asthma and/or wheezing in young children?
4. Does use of medications that disturb the microbiome in infancy increase subsequent risk of developing allergic diseases?

*Group 4:*

1. Observational study of AB use and its impact on te microbiome and health in early life

A research question encompassing exposure, outcome and the domain of the study was formulated by one author in group 1 (number 3, although forgetting the question mark at the end of the sentence). This was also the case for one author in group 2 (number 9). Number 9 also reported the location where the study was performed, which is not relevant in the research question of a study. Another author in group 2 (number 5) formulated a question, but did not encompass all three elements. Also this author reports the location where the study was performed. In group 3, one author (number 12) formulated a research question encompassing all three elements. Another author in group 3 (number 13) formulated a research question but did not encompass the domain of the study.

All other authors reported the aim or the objective of the study instead of a research question. Number 4 also includes in the answer the way the data were collected for the study and number 14 also describes the type of study that was performed.

**Theoretical design**

The authors were asked to indicate the domain of their study, to translate the research question into an occurrence function and to indicate the directionality (select one of the presented occurrence functions) for their study.

Domain

*Group 1:*

1. Children
2. Human epidemiologic study (but I'm not 100% clear on your meaning of domain)
3. Pregnant women (population-based).

*Group 2:*

1. Not sure about the question
2. Respiratory Epidemiology in children
3. The domain was children aged 6 to 7 years who were enrolled in school and resided in the city of San Francisco (province of Córdoba, Argentina) and the surrounding rural areas that have a similar climate, and dairy farm activities and grain harvests (soya, corn, and wheat) are common.
4. A cross-sectional survey of 10 873 6–7-year-old children in Auckland, Bay of Plenty, Nelson and Christchurch
5. Epidemiology and Public Health
6. pediatric allergy, birth cohort

*Group 3:*

1. Observational study in asthma
2. I am not quite get the question itself
3. I'm not sure what this means. Clinical research?
4. allergy

*Group 4:*

1. Human health & microbiology

In group 1, one author (number 1) reported the domain of the study. In group 2, one author (number 6) reported the domain. This author also specifies the location where the study population was selected from. This location does not represent the domain, but only the location where participants were recruited in order to sample within the domain of the study. For two authors (number 5 and 7) in group 2, the domain could be deduced from the answer. Number 5 also indicates the area of research which is not relevant for the specification of the domain. Number 7 also specifies the type of survey carried out and the location where the study population was selected, but both are not relevant for the specification of the domain.

The other authors did not specify the domain of their study, neither could it be deduced from their answers. In group 1, one author (number 3) refers to the population in which exposure was measured (as the domain) instead of the population in which the outcome was measured. Five other authors reported the area or topic of research instead of the domain (numbers 8 and 9 in group 2, numbers 10 and 13 in group 3 and number 14 in group 4). The remaining authors (number 2 in group 1, number 4 in group 2 and numbers 11-12 in group 3) reported that they were not sure about the meaning of domain or did not understand the question. Number 2 explains what type of study they performed in general terms (an epidemiological study in humans). Number 12 asked whether ‘domain’ could be the type of research.

Occurrence function

*Group 1:*

1. The use of antibiotic therapy early in life influences the risk of developing asthma through the immunomodulatory effect of antibiotic on the immune system, which leads to imbalanced Th1/Th2. Although, it is also possible that children who are in need of antibiotic early in life have already a Th1/Th2 imbalanced caused by the infections treated with the antibiotic and that this makes them more susceptible for asthma later in life.
2. Birth cohort design
3. Not sure what you mean here. Asthma in preschool children as a function of antibiotic use in pregnant women, independent of risk covariates*.*

*Group 2:*

1. Not sure
2. none. this is simply and observation but to casual.
3. Antibiotic use in the first year of life was associated with current wheeze and allergic rhinoconjunctivitis among school-aged children who lived in an urban area of Córdoba (Argentina) early in their lives, but not among children who lived in a rural area early in their lives. This results suggested that rural residence in early life may protect against detrimental effects of antibiotic use on allergic diseases among children.”
4. Don't understand the question
5. I am not sure of the meaning of your question, I always think that the research question could be applied to basic epidemiological design (e.g. whether we could know the causal association of our research question by cohort study).
6. Allergic diseases such as asthma, atopic dermatitis, and allergic rhinitis are common chronic diseases around the world and have led to a greater economic burden in health care costs. Antibiotic prescriptions were still made on a large scale in Japan, with 60% of patients prescribed antibiotics for upper respiratory infections in 2009.

*Group 3:*

1. I do not understand this question
2. Again, I am not familiar with the terminology here. I am not sure how to address your question
3. I'm not looking at a causal relationship since this is a prospective cohort study, not a randomized controlled trial. I'm looking at an association. I'm not sure what an occurrence relation or theoretical design is. Theoretically, antibiotics may impair the immune system in developing fetus, supporting the hygiene hypothesis.
4. We found a statistically significant association between use of antibiotics and antacid medications during the first 6 months of infancy and subsequent development of allergic disease. As a retrospective study, were identified association but cannot conclude causation.

*Group 4:*

1. This was an observational trial as alternatives are not considered ethical. Hence, so no causality can be inferred. However, a causal relation between antibiotic use and antibiotic resistance was inferred. We observed an association between antibiotic use (of notably macrolides) and disturbed microbiota, BMI-z and asthma (at 5 years).

Only one author (number 3 in group 1) formulated the occurrence function of their study, even though the author was not completely sure about the meaning of the question.

All other authors did not formulate an occurrence function. In group 1, number 1 explained the rationale for performing the study and the biological pathway for the association studied. Also number 9 in group 2 reports the rationale for performing the study. Some authors (number 6 in group 2, number 13 in group 3 and number 14 in group 4) summarized the results of their study instead of formulating an occurrence function. Number 13 adds to the answer that they could not conclude causation because they performed a retrospective study. Number 14 reports the type of study that was performed and also states that they could not infer causality because they conducted an observational trial. Nevertheless, they inferred a causal relation between antibiotic use and antibiotic resistance. Author number 2 in group 1 only reports the type of study that was performed. One author (number 5 in group 2) states that there is no occurrence function for their study and describes their study as an ‘observation’ and not causal. However, in the article the authors did investigate the relationship between antibiotic use and the occurrence of asthma. The other remaining authors (numbers 4, 7 and 8 in group 2 and numbers 10-12 in group 3) indicated that they were not sure about the question or did not understand it. Number 12 (in group 3) states that they did not look at a causal relationship because they have performed a prospective cohort study and not a randomized controlled trial (RCT).

Directionality between outcome (asthma) and exposure (antibiotics) (occurrence function)

*Group 1:*

1. The current incidence of asthma as a function of current exposure to antibiotics.
2. The future prevalence of asthma as a function of current exposure to antibiotics.
3. The current incidence of asthma as a function of past exposure to antibiotics.

*Group 2:*

1. The current incidence of asthma as a function of past exposure to antibiotics.
2. The current prevalence of asthma as a function of past exposure to antibiotics.
3. The current prevalence of asthma as a function of past exposure to antibiotics*.*
4. The current prevalence of asthma as a function of past exposure to antibiotics.
5. The current incidence of asthma as a function of past exposure to antibiotics.
6. The current prevalence of asthma as a function of past exposure to antibiotics.

*Group 3*

1. The current incidence of asthma as a function of past exposure to antibiotics.
2. The current prevalence of asthma as a function of past exposure to antibiotics.
3. The current incidence of asthma as a function of past exposure to antibiotics.
4. Other: Technically we used incidence density as a function of past exposure to antibiotics since time of follow-up varied per child.

*Group 4:*

1. The future incidence of asthma as a function of current exposure to antibiotics.

In group 1, the directionality selected by number 3 in the questionnaire was concordant with the directionality deduced from the article. This was also the case for number 5 and 7 in group 2 and for number 10 in group 3.

For four articles the directionality could not be deduced from the information in the article (number 2 in group 1, number 6 in group 2, number 11 in group 3 and number 14 in group 4. Number 2 and 14 selected in the questionnaire to have investigated the ‘future occurrence of asthma as a function of current exposure to antibiotics’. Number 6 and 11 selected in the questionnaire to have investigated the ‘current occurrence of asthma as a function of past exposure to antibiotics’.

For all other authors, the selected directionality in the questionnaire was not in concordance with the directionality that was deduced from the information in the article. Number 1 in group 1 indicates that the directionality is cross-sectional. For numbers 4 and 9 in group 2 HB and JW extracted from the article that the directionality was the ‘future occurrence of asthma as a function of current exposure to antibiotics’ because the authors report in the article to have performed a ‘(prospective) cohort study’. In the questionnaire, number 9 reports to have sampled the study population as the general population from a birth cohort. Number 4 reports in the questionnaire to have included all records from administrative data and to have performed a population-based birth cohort study. For number 8 in group 2, the directionality deduced from the article was ‘future incidence of asthma as a function of current exposure to antibiotics’. In the article the authors reported to have performed a retrospective cohort study and to have used Cox proportional hazards to estimate a hazard ratio. In the questionnaire however, the author reports to have sampled the study population by cumulative sampling (which is a sampling method in ‘nested case-control’ studies). For number 12 in group 3, the directionality deduced from the information in the article was ‘future incidence of asthma as a function of current exposure to antibiotics’, because the authors reported in the article to have performed a cohort/prospective study. Also in the questionnaire, the author reports to have performed a ‘prospective cohort study’.

**Causal theory**

The authors were asked whether they used any aspect of causal theory to select confounders and/or effect modifiers and if so, which aspect of causal theory.

*Group 1:*

1. Bradford Hill criteria with confounding factors identified in the literature. This study was conducted in the early 2000s prior to the popular use of DAG.
2. DAG

In group 1, two authors reported to have used some aspect of causal theory to select confounders and or effect modifiers. Number 2 reports in the questionnaire to have used the Bradford Hill criteria with confounding factors identified in literature for the selection of confounders. This information was not reported in the article. Number 3 reports in the questionnaire to have used directed acyclic graphs (DAGs), but in the article the authors reported to have used previous publications for the selection of confounders and/or effect modifiers.

In group 1, 2 and 3 all other authors indicated to not have used any aspect of causal theory to select confounders and/or effect modifiers, even though all report to have adjusted for confounding in the article. Of these, four authors report in the article some justification for selecting confounders and effect modifiers (numbers 5 and 8 in group 2 and numbers 11 and 13 in group 3), albeit it not being some aspect of causal theory (eg selection of confounders based on previous publications).

The author in group 4 (number 14) indicated to not have used any aspect of causal theory, neither in the questionnaire nor in the article. In the study (according to what was reported in the article) no confounders or effect modifiers were taken into account. In the questionnaire however, the author does indicate to have adjusted for age development.

**Confounding**

The authors were asked which confounders they adjusted for.

All authors reported to be moderately to extremely knowledgeable with the concept of confounding. The majority of the authors reported the same information on adjustment for confounding in the questionnaire and in the article.

In group 2 there was one author (number 10) that reported in the questionnaire to not have adjusted for confounding because they were not looking at causal relationships. In the article however, a set of confounders adjusted for was reported. In group 4, number 14 reported in the questionnaire to have adjusted for age development, while this was not reported in the article.

**Effect modification**

The authors were asked whether they took into account effect modification and if so, which effect modifiers.

The majority of the authors reported to be moderately to extremely knowledgeable with the concept of effect modification. Among these authors, three did not consistently report the same information on taking into account effect modification in the questionnaire and in the article (number 3 of group 1 and numbers 11 and 13 of group 3):

One author reported not to be knowledgeable at all with the concept of effect modification (number 14 in group 4) and another author reported to be somewhat knowledgeable with this concept (number 9 in group 2).
